# Supplementary material for: A generalized-template-based graph neural network for accurate organic reactivity prediction
Source: Springer Nature journal article supplement (doi:10.1038/s42256-022-00526-z), 2022-09-15
Supplement: 42256_2022_526_MOESM1_ESM.pdf [file 42256_2022_526_MOESM1_ESM.pdf]

---

**Supplementary information**

---

**A generalized-template-based graph neural network for accurate organic reactivity prediction**

---

In the format provided by the authors and unedited

## Supporting information

# A Generalized Template-Based Graph Neural Network for Accurate Organic Reactivity Prediction

Shuan Chen and Yousung Jung\*

Department of Chemical and Biomolecular Engineering, KAIST, 291 Daehak-ro, Daejeon 34141, South Korea

### S1. Examples of generalized reaction templates (GRTs)

| Rank (frequency) | Generalized reaction template | Rank (frequency) | Generalized reaction template |
|------------------|-------------------------------|------------------|-------------------------------|
| 1 (38.1%)        |                               | 6 (2.46%)        |                               |
| 2 (11.5%)        |                               | 7 (2.43%)        |                               |
| 3 (6.85%)        |                               | 8 (2.17%)        |                               |
| 4 (4.70%)        |                               | 9 (2.12%)        |                               |
| 5 (2.50%)        |                               | 10 (1.75%)       |                               |

Figure S1. Top ten most popular generalized reaction templates derived from the train set of USPTO-480k dataset.

| Reaction description                | Previous reaction template | Local reaction template | Generalized reaction template |
|-------------------------------------|----------------------------|-------------------------|-------------------------------|
| Hydrolysis of alkyl ether/ester     |                            |                         |                               |
| Reduction of nitro to primary amine |                            |                         |                               |
| Hydrolysis of ester                 |                            |                         |                               |
| Dealkylation of tertiary amine      |                            |                         |                               |
| Dealkylation of secondary amine     |                            |                         |                               |

Figure S2. Comparison between previous reaction template<sup>1</sup>, local reaction template<sup>2</sup> and generalized reaction template (GRT) with five different reaction types.

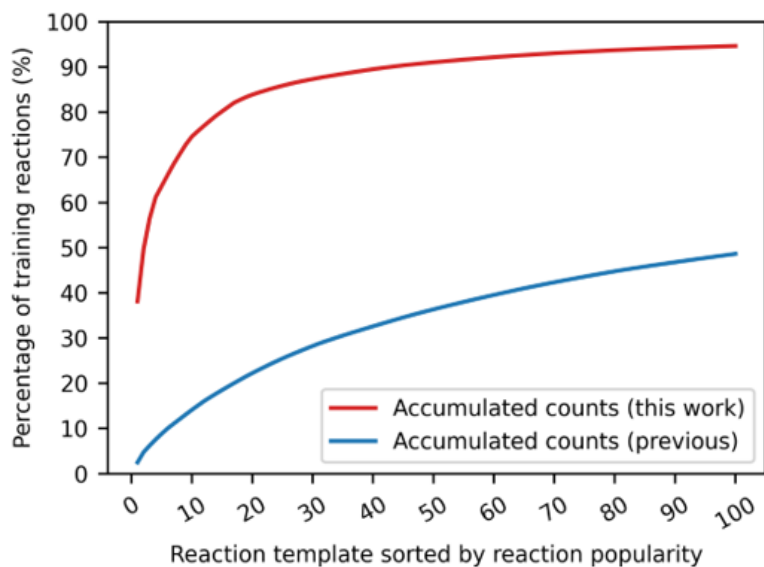

Figure S3. The percentage of the training reactions that are cumulatively covered by the top 100 most popular GRTs, compared with a previous template extraction method<sup>1</sup>

| Number of actions | Generalized reaction template                                       | Example reaction |
|-------------------|---------------------------------------------------------------------|------------------|
| 1                 | $A_1-A_2 \longrightarrow A_1$                                       |                  |
| 2                 | $A_1 \quad A_2-A_3 \longrightarrow A_1-A_2$                         |                  |
| 3                 | $A_1 \quad A_4=A_2-A_3 \longrightarrow A_1-A_2=A_3$                 |                  |
| 4                 | $A_3-A_1 \quad A_2-A_4 \longrightarrow A_1-A_2$                     |                  |
| 5                 | $A_1-A_3 \quad A_5=A_2-A_3 \longrightarrow A_1-A_2=A_3$             |                  |
| 6                 | $A_1-A_3 \quad A_4 \quad A_5 \quad A_2-A_6 \longrightarrow A_1-A_2$ |                  |

Figure S4. The most popular GRTs requiring 1 to 6 actions and their example reactions. Note that the atom-mapping of the most popular GRT requiring 6 actions seems to be questionable.

## S2 Results of separated prediction scenario

**Table S1.** Top-k exact match accuracy on USPTO-480k dataset in separated prediction scenario. The best top-k exact match accuracy is highlighted with bold font.

| Model                              | Model type     | Top-k Accuracy (%) |      |      |      |
|------------------------------------|----------------|--------------------|------|------|------|
|                                    |                | K = 1              | 2    | 3    | 5    |
| Molecular Transformer <sup>3</sup> | Sequence-based | 90.4               | 93.7 | 94.6 | 95.3 |
| Augmented Transformer <sup>4</sup> | Sequence-based | 91.9               | 95.4 | /    | 97.0 |
| Chemformer <sup>5</sup>            | Sequence-based | 92.8               | /    | /    | 94.9 |
| WLDN <sup>6</sup>                  | Graph-based    | 85.6               | 90.5 | 92.8 | 93.4 |
| MEGAN <sup>7</sup>                 | Graph-based    | 89.3               | 92.7 | 94.4 | 95.6 |
| Symbolic <sup>8</sup>              | Graph-based    | 90.4               | 93.2 | 94.1 | 95.0 |
| NERF <sup>9</sup>                  | Graph-based    | 90.7               | 92.3 | 93.3 | 93.7 |
| <i>LocalTransform (this work)</i>  | Graph-based    | 92.3               | 95.6 | 96.5 | 97.2 |

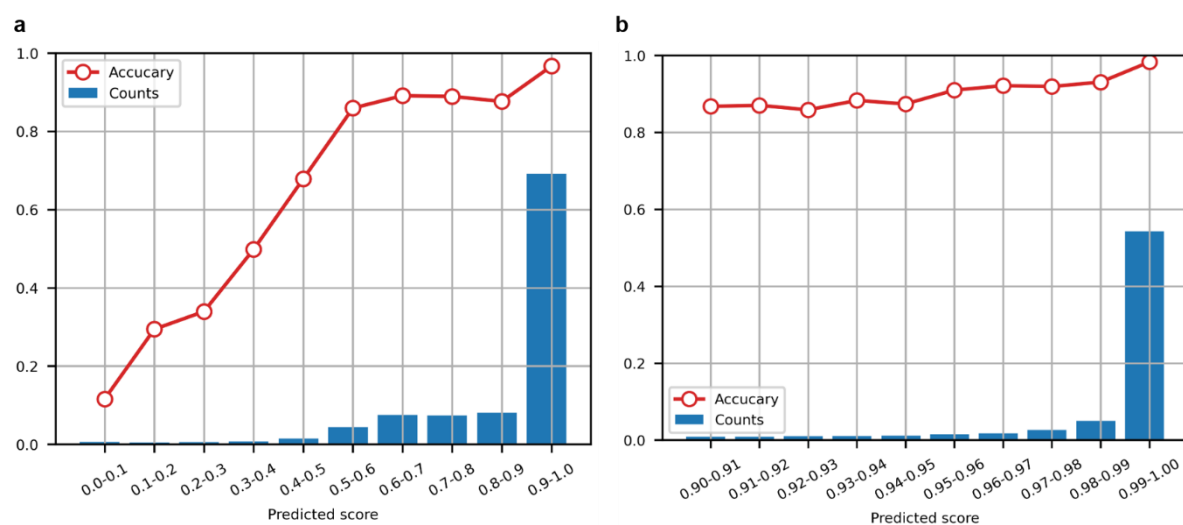

Figure S5. (a) The top-1 exact match accuracies and the accumulated counts compared with prediction score in the separated prediction scenario. (b) The top-1 exact match accuracies and the accumulated counts compared with prediction score between 0.9 and 1.0.

### S3 Ablation studies

Table S2. Ablation studies of *LocalTransform*.

| Prediction scenario | Model                   | Top-k Accuracy (%) |      |      |      |
|---------------------|-------------------------|--------------------|------|------|------|
|                     |                         | K = 1              | 2    | 3    | 5    |
| Separated           | <i>LocalTransform</i>   | 92.4               | 95.6 | 96.5 | 97.2 |
|                     | wo/ bond-wise attention | 91.8               | 95.3 | 96.2 | 96.7 |
|                     | wo/ atom-wise attention | 86.6               | 93.8 | 95.4 | 96.2 |
| Mixed               | <i>LocalTransform</i>   | 90.8               | 94.8 | 95.7 | 96.3 |
|                     | wo/ bond-wise attention | 89.8               | 94.2 | 95.4 | 96.0 |
|                     | wo/ atom-wise attention | 47.1               | 56.2 | 60.2 | 63.5 |

## S4 highly-scored (>0.999) incorrect predictions

a

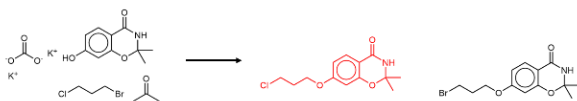

b

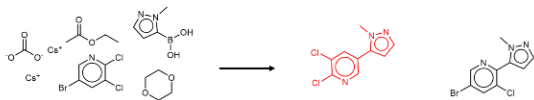

c

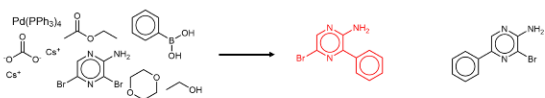

d

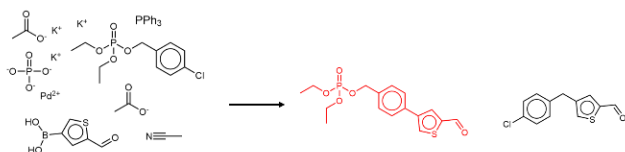

e

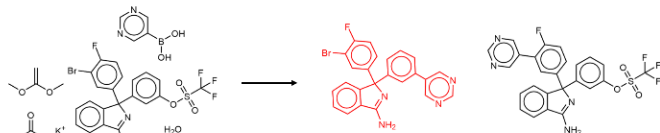

f

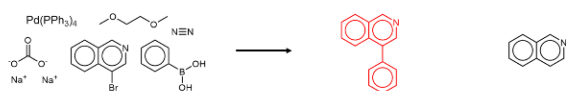

g

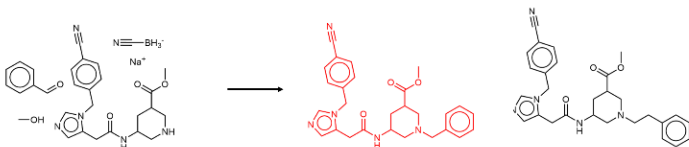

h

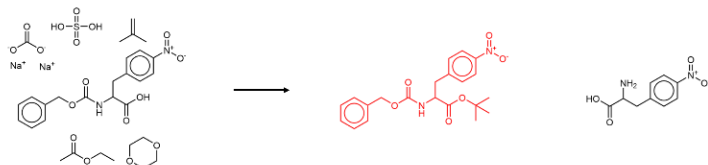

i

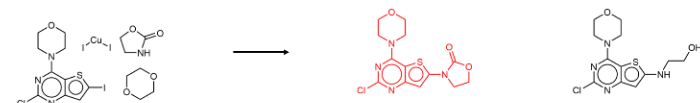

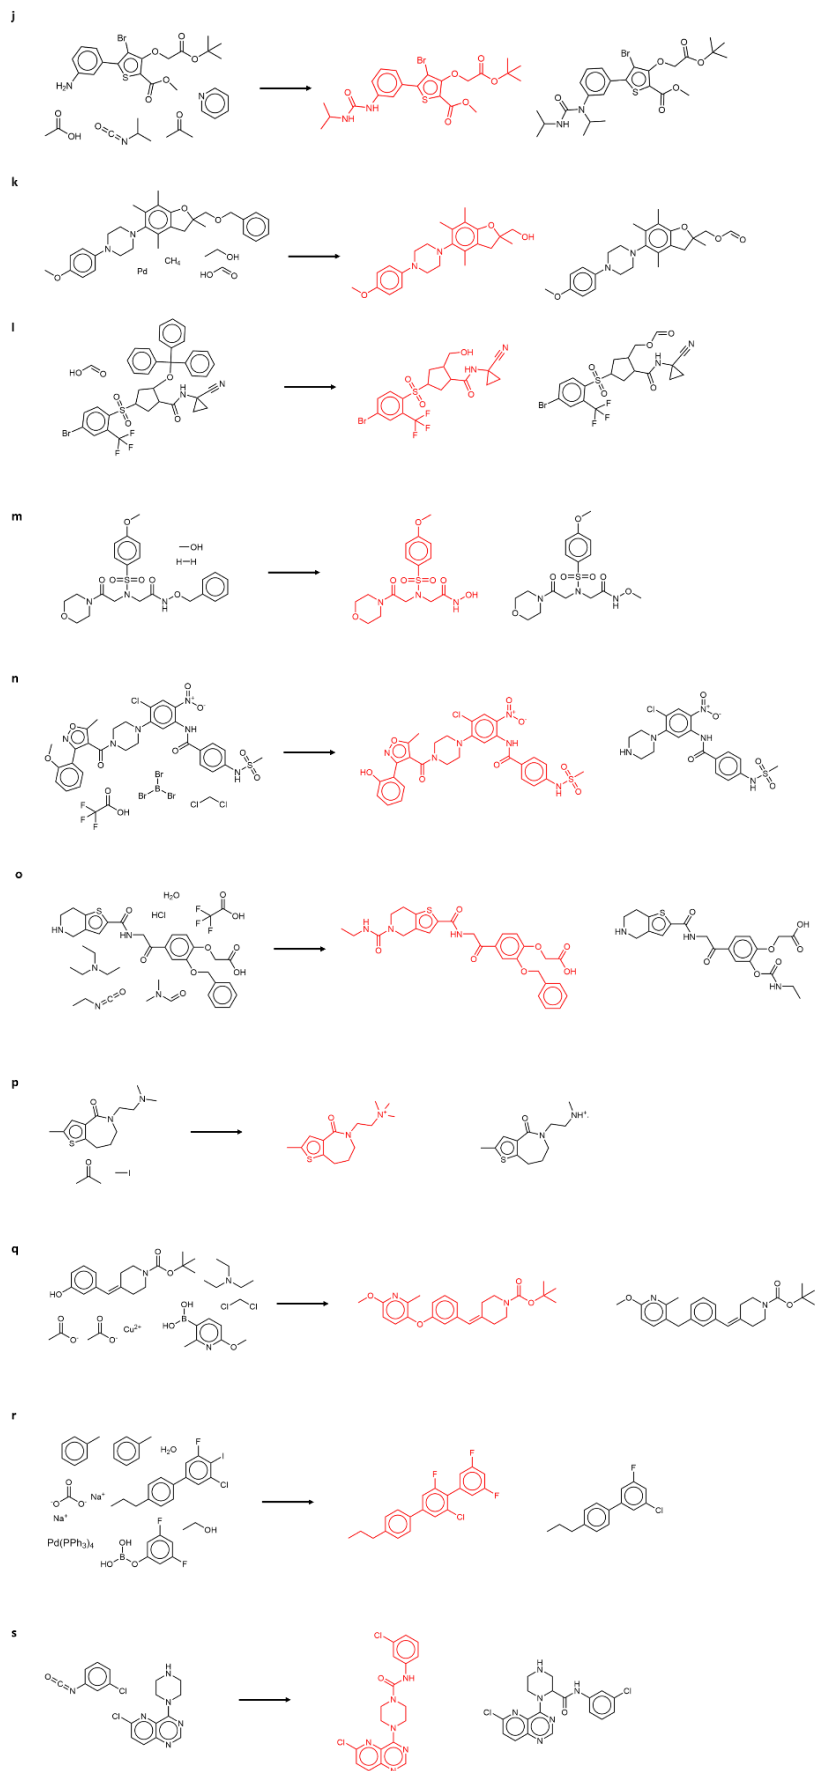

Figure S6. Predictions with very high score (>0.999) but inconsistent with ground truth product. The predictions of LocalTransform are color coded in red and the ground truths are color coded in black.

## S5 Prediction accuracy as a function of template popularity

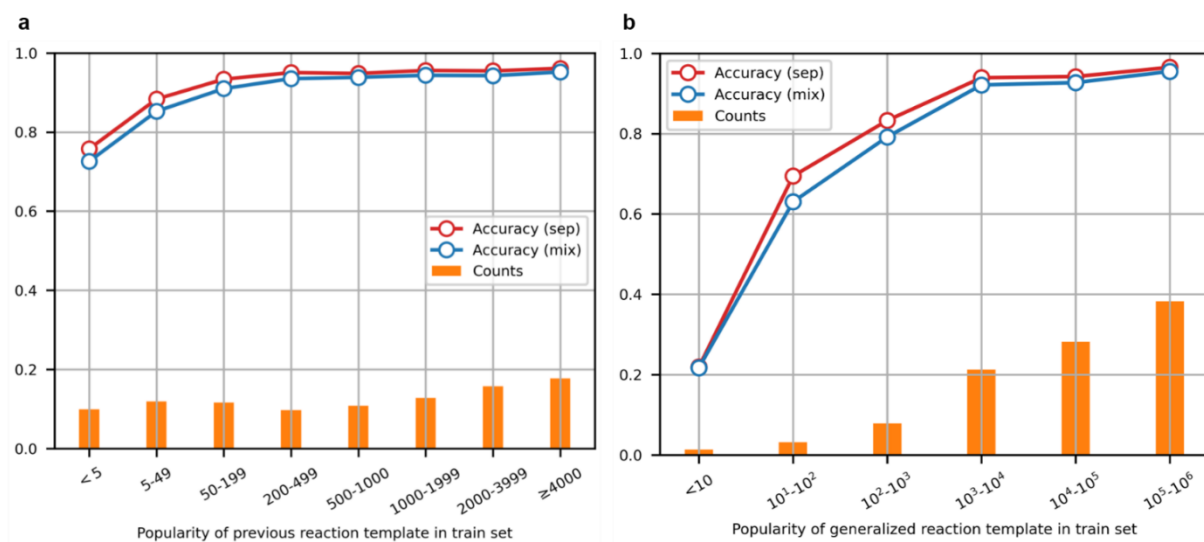

Figure S7. Prediction accuracy as a function of popularity of (a) previous reaction templates<sup>1</sup> and (b) GRTs.



## S6 Reactions with potential wrong atom-mapping

### Reaction #1108

Original atom-mapping

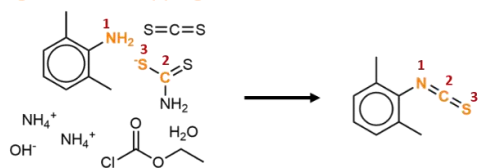

LocalTransform prediction (0.50)

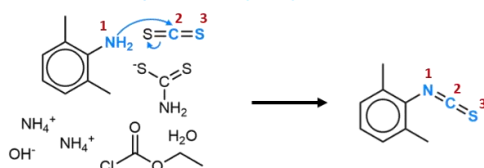

### Reaction #16389

Original atom-mapping

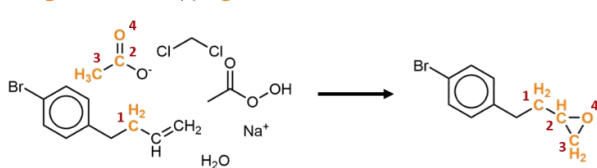

LocalTransform prediction (0.72)

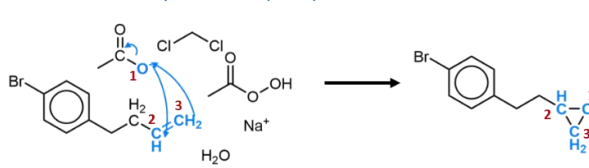

### Reaction #27411

Original atom-mapping

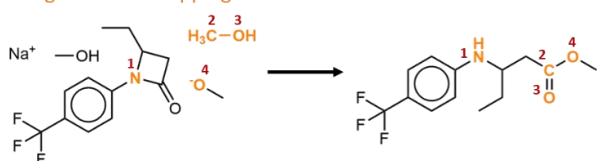

LocalTransform prediction (0.77)

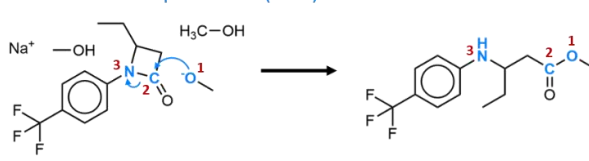

### Reaction #35298

Original atom-mapping

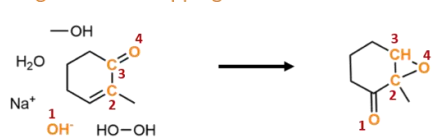

LocalTransform prediction (0.86)

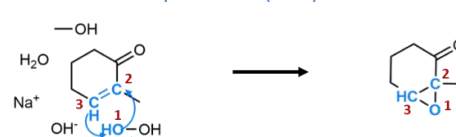

Figure S8. Reactions with potential wrong atom-mapping. The numbers written after “LocalTransform prediction” are prediction scores. The original atom-mappings of the shown reactions are questionable while *LocalTransform* predict the same products with reasonable GRT and yield more rational atom-mapping.

## S7 Atom and Bond Featurization

**Table S3.** The chemical properties for initializing atom features and bond features.

| Feature type  | Chemical information                                                                                                                                    |
|---------------|---------------------------------------------------------------------------------------------------------------------------------------------------------|
| Atom features | atom types, chirality, formal charge, partial charge, aromaticity, hybridization, hydrogen bond donor/acceptor, the number of rings the atom belongs to |
| Bond features | Bond type, bond conjugation, bond in ring, stereo configuration                                                                                         |

## S8 Hyperparameter optimization

**Table S4.** A list of hyperparameters that are optimized in this work.

| Hyperparameter                                            | Values                            |
|-----------------------------------------------------------|-----------------------------------|
| Training batch size                                       | 8, 16, 32                         |
| Learning rate (starting)                                  | $10^{-3}$ , $10^{-4}$ , $10^{-5}$ |
| Hidden dimension of atom feature                          | 128, 256, 512                     |
| Iteration of message passing                              | 3, 4, 5                           |
| Number of attention blocks (both atom-wise and bond-wise) | 2, 3, 4, 5                        |

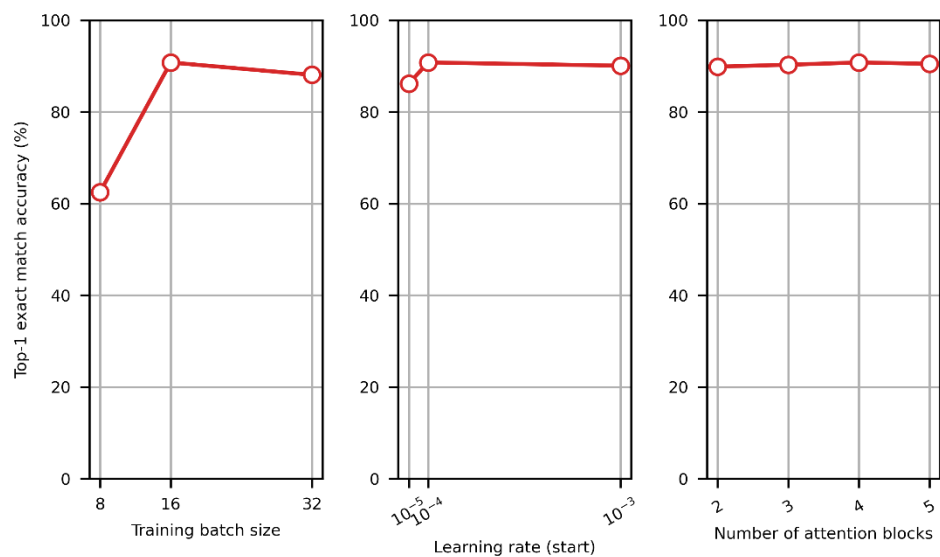

Figure S9. The effect of different hyperparameters on the top-1 exact match accuracy in mixed prediction scenario.

## References

1. Coley, C. W., Barzilay, R., Jaakkola, T. S., Green, W. H. & Jensen, K. F. Prediction of Organic Reaction Outcomes Using Machine Learning. *ACS Cent. Sci.* **3**, 434–443 (2017).
2. Chen, S. & Jung, Y. Deep Retrosynthetic Reaction Prediction using Local Reactivity and Global Attention. *JACS Au* **1**, 1612–1620 (2021).
3. Schwaller, P. *et al.* Molecular Transformer: A Model for Uncertainty-Calibrated Chemical Reaction Prediction. *ACS Central Science* **5**, 1572–1583 (2019).
4. Tetko, I. V., Karpov, P., Van Deursen, R. & Godin, G. State-of-the-art augmented NLP transformer models for direct and single-step retrosynthesis. *Nature Communications* **11**, 5575 (2020).
5. Irwin, R., Dimitriadis, S., He, J. & Bjerrum, E. Chemformer: A Pre-Trained Transformer for Computational Chemistry. Preprint at <https://chemrxiv.org/engage/chemrxiv/article-details/60ee8a3eb95bdd06d062074b> (2021).
6. W. Coley, C. *et al.* A graph-convolutional neural network model for the prediction of chemical reactivity. *Chemical Science* **10**, 370–377 (2019).
7. Sacha, M. *et al.* Molecule Edit Graph Attention Network: Modeling Chemical Reactions as Sequences of Graph Edits. *Journal of Chemical Information and Modeling* **61**, 3273–3284 (2021).
8. Qian, W. W. *et al.* Integrating Deep Neural Networks and Symbolic Inference for Organic Reactivity Prediction. Preprint at <https://doi.org/10.26434/chemrxiv.11659563.v1> (2020).
9. Bi, H. *et al.* Non-Autoregressive Electron Redistribution Modeling for Reaction Prediction. Preprint at <https://arxiv.org/abs/2106.07801> (2021).
10. W. Coley, C. *et al.* A graph-convolutional neural network model for the prediction of chemical reactivity. *Chemical Science* **10**, 370–377 (2019).
